# Supplementary material for: Effect of different long-term fertilizer managements on soil nitrogen fixing bacteria community in a double-cropping rice paddy field of southern China
Source: PubMed Central journal article supplement (PMC8409621; doi:10.1371/journal.pone.0256754), 2021-09-01
Supplement: pone.0256754.s003.pdf [file pone.0256754.s003.pdf]

# PLOS ONE

## Effect of different long-term fertilizer management on nitrogen fixing bacteria community in a double-cropping paddy field of southern China

--Manuscript Draft--

|                                                                                                                                                                                                                            |                                                                                                                                                                                                                                                                                                                                                                                                                                                                                                                                                                                                                                                                                                                                                                                                                                                                                                                                                                                                                                                                                                                                                                                                                                                                                                                                                                                                                                                                                                                                                                                                                                                                                                                                                                                                                                                                                          |
|----------------------------------------------------------------------------------------------------------------------------------------------------------------------------------------------------------------------------|------------------------------------------------------------------------------------------------------------------------------------------------------------------------------------------------------------------------------------------------------------------------------------------------------------------------------------------------------------------------------------------------------------------------------------------------------------------------------------------------------------------------------------------------------------------------------------------------------------------------------------------------------------------------------------------------------------------------------------------------------------------------------------------------------------------------------------------------------------------------------------------------------------------------------------------------------------------------------------------------------------------------------------------------------------------------------------------------------------------------------------------------------------------------------------------------------------------------------------------------------------------------------------------------------------------------------------------------------------------------------------------------------------------------------------------------------------------------------------------------------------------------------------------------------------------------------------------------------------------------------------------------------------------------------------------------------------------------------------------------------------------------------------------------------------------------------------------------------------------------------------------|
| <b>Manuscript Number:</b>                                                                                                                                                                                                  | PONE-D-20-36146                                                                                                                                                                                                                                                                                                                                                                                                                                                                                                                                                                                                                                                                                                                                                                                                                                                                                                                                                                                                                                                                                                                                                                                                                                                                                                                                                                                                                                                                                                                                                                                                                                                                                                                                                                                                                                                                          |
| <b>Article Type:</b>                                                                                                                                                                                                       | Research Article                                                                                                                                                                                                                                                                                                                                                                                                                                                                                                                                                                                                                                                                                                                                                                                                                                                                                                                                                                                                                                                                                                                                                                                                                                                                                                                                                                                                                                                                                                                                                                                                                                                                                                                                                                                                                                                                         |
| <b>Full Title:</b>                                                                                                                                                                                                         | Effect of different long-term fertilizer management on nitrogen fixing bacteria community in a double-cropping paddy field of southern China                                                                                                                                                                                                                                                                                                                                                                                                                                                                                                                                                                                                                                                                                                                                                                                                                                                                                                                                                                                                                                                                                                                                                                                                                                                                                                                                                                                                                                                                                                                                                                                                                                                                                                                                             |
| <b>Short Title:</b>                                                                                                                                                                                                        | nitrogen fixing bacteria community                                                                                                                                                                                                                                                                                                                                                                                                                                                                                                                                                                                                                                                                                                                                                                                                                                                                                                                                                                                                                                                                                                                                                                                                                                                                                                                                                                                                                                                                                                                                                                                                                                                                                                                                                                                                                                                       |
| <b>Corresponding Author:</b>                                                                                                                                                                                               | Haiming Tang<br>Hunan Soil and Fertilizer Institute<br>Changsha, CHINA                                                                                                                                                                                                                                                                                                                                                                                                                                                                                                                                                                                                                                                                                                                                                                                                                                                                                                                                                                                                                                                                                                                                                                                                                                                                                                                                                                                                                                                                                                                                                                                                                                                                                                                                                                                                                   |
| <b>Keywords:</b>                                                                                                                                                                                                           | rice; fertilizer treatment; N fixing bacteria; nifH gene; paddy field                                                                                                                                                                                                                                                                                                                                                                                                                                                                                                                                                                                                                                                                                                                                                                                                                                                                                                                                                                                                                                                                                                                                                                                                                                                                                                                                                                                                                                                                                                                                                                                                                                                                                                                                                                                                                    |
| <b>Abstract:</b>                                                                                                                                                                                                           | <p>While nitrogen (N) fixation by soil microorganisms is an important N cycling processes, but there is still limited information on how the soil microbes that drive this processes respond to soil physical and chemical properties changes under double-cropping rice (<i>Oryza sativa</i> L.) paddy field in southern China. Therefore, the 34-year long-term fertilizer regime on nitrogen fixing bacteria community under double-cropping rice field in southern China were studied by using PCR-DGGE method in the present paper. The field experiment were including four different fertilizer treatments: chemical fertilizer alone (MF), rice straw residue and chemical fertilizer (RF), 30% organic manure and 70% chemical fertilizer (OM), and without fertilizer input as control (CK). The results showed that the diversity index of cbbLR gene and nifH gene were increased with RF and OM treatments, compared with CK treatment. Compared with CK treatment, the abundance of cbbLR gene were increased by 6.70, 12.19 and 23.94×10<sup>7</sup> copies g<sup>-1</sup> with MF, RF and OM treatments, respectively. Meanwhile, the abundance of nifH gene were increased by 5.40, 8.82 and 23.90×10<sup>9</sup> copies g<sup>-1</sup> with MF, RF and OM treatments, compared with CK treatment, respectively. The results also indicated that soil autotrophic azotobacter and nitrogenase activities with RF and OM treatments were significantly higher (p&lt;0.05) than that of CK treatments. There is an obvious difference in characteristic of N fixing bacteria community between application of inorganic fertilizers and organic manure treatments. In summary, the results indicated that abundances of N fixing bacteria community in the double-cropping rice paddy soil were increased by application of crop residue and organic manure practice.</p> |
| <b>Order of Authors:</b>                                                                                                                                                                                                   | <p>Haiming Tang</p> <p>Chao Li</p> <p>Lihong Shi</p> <p>Xiaoping Xiao</p> <p>Kaikai Cheng</p> <p>Li Wen</p> <p>Weiyan Li</p>                                                                                                                                                                                                                                                                                                                                                                                                                                                                                                                                                                                                                                                                                                                                                                                                                                                                                                                                                                                                                                                                                                                                                                                                                                                                                                                                                                                                                                                                                                                                                                                                                                                                                                                                                             |
| <b>Additional Information:</b>                                                                                                                                                                                             |                                                                                                                                                                                                                                                                                                                                                                                                                                                                                                                                                                                                                                                                                                                                                                                                                                                                                                                                                                                                                                                                                                                                                                                                                                                                                                                                                                                                                                                                                                                                                                                                                                                                                                                                                                                                                                                                                          |
| <b>Question</b>                                                                                                                                                                                                            | <b>Response</b>                                                                                                                                                                                                                                                                                                                                                                                                                                                                                                                                                                                                                                                                                                                                                                                                                                                                                                                                                                                                                                                                                                                                                                                                                                                                                                                                                                                                                                                                                                                                                                                                                                                                                                                                                                                                                                                                          |
| <b>Financial Disclosure</b>                                                                                                                                                                                                | The author(s) received no specific funding for this work.                                                                                                                                                                                                                                                                                                                                                                                                                                                                                                                                                                                                                                                                                                                                                                                                                                                                                                                                                                                                                                                                                                                                                                                                                                                                                                                                                                                                                                                                                                                                                                                                                                                                                                                                                                                                                                |
| Enter a financial disclosure statement that describes the sources of funding for the work included in this submission. Review the <a href="#">submission guidelines</a> for detailed requirements. View published research |                                                                                                                                                                                                                                                                                                                                                                                                                                                                                                                                                                                                                                                                                                                                                                                                                                                                                                                                                                                                                                                                                                                                                                                                                                                                                                                                                                                                                                                                                                                                                                                                                                                                                                                                                                                                                                                                                          |

articles from [PLOS ONE](#) for specific examples.

This statement is required for submission and **will appear in the published article** if the submission is accepted. Please make sure it is accurate.

#### Unfunded studies

Enter: *The author(s) received no specific funding for this work.*

#### Funded studies

Enter a statement with the following details:

- Initials of the authors who received each award
- Grant numbers awarded to each author
- The full name of each funder
- URL of each funder website
- Did the sponsors or funders play any role in the study design, data collection and analysis, decision to publish, or preparation of the manuscript?
- **NO** - Include this sentence at the end of your statement: *The funders had no role in study design, data collection and analysis, decision to publish, or preparation of the manuscript.*
- **YES** - Specify the role(s) played.

\* typeset

#### Competing Interests

Use the instructions below to enter a competing interest statement for this submission. On behalf of all authors, disclose any [competing interests](#) that could be perceived to bias this work—acknowledging all financial support and any other relevant financial or non-financial competing interests.

This statement **will appear in the published article** if the submission is accepted. Please make sure it is accurate. View published research articles from [PLOS ONE](#) for specific examples.

The authors have declared that no competing interests exist.

**NO authors have competing interests**

Enter: *The authors have declared that no competing interests exist.*

**Authors with competing interests**

Enter competing interest details beginning with this statement:

*I have read the journal's policy and the authors of this manuscript have the following competing interests: [insert competing interests here]*

\* typeset

**Ethics Statement**

N/A

Enter an ethics statement for this submission. This statement is required if the study involved:

- Human participants
- Human specimens or tissue
- Vertebrate animals or cephalopods
- Vertebrate embryos or tissues
- Field research

Write "N/A" if the submission does not require an ethics statement.

General guidance is provided below. Consult the [submission guidelines](#) for detailed instructions. **Make sure that all information entered here is included in the Methods section of the manuscript.**

**Format for specific study types**

**Human Subject Research (involving human participants and/or tissue)**

- Give the name of the institutional review board or ethics committee that approved the study
- Include the approval number and/or a statement indicating approval of this research
- Indicate the form of consent obtained (written/oral) or the reason that consent was not obtained (e.g. the data were analyzed anonymously)

**Animal Research (involving vertebrate animals, embryos or tissues)**

- Provide the name of the Institutional Animal Care and Use Committee (IACUC) or other relevant ethics board that reviewed the study protocol, and indicate whether they approved this research or granted a formal waiver of ethical approval
- Include an approval number if one was obtained
- If the study involved *non-human primates*, add *additional details* about animal welfare and steps taken to ameliorate suffering
- If anesthesia, euthanasia, or any kind of animal sacrifice is part of the study, include briefly which substances and/or methods were applied

**Field Research**

Include the following details if this study involves the collection of plant, animal, or other materials from a natural setting:

- Field permit number
- Name of the institution or relevant body that granted permission

**Data Availability**

Authors are required to make all data underlying the findings described fully available, without restriction, and from the time of publication. PLOS allows rare exceptions to address legal and ethical concerns. See the [PLOS Data Policy](#) and [FAQ](#) for detailed information.

Yes - all data are fully available without restriction

A Data Availability Statement describing where the data can be found is required at submission. Your answers to this question constitute the Data Availability Statement and **will be published in the article**, if accepted.

**Important:** Stating 'data available on request from the author' is not sufficient. If your data are only available upon request, select 'No' for the first question and explain your exceptional situation in the text box.

Do the authors confirm that all data underlying the findings described in their manuscript are fully available without restriction?

**Describe where the data may be found in full sentences. If you are copying our sample text, replace any instances of XXX with the appropriate details.**

- If the data are **held or will be held in a public repository**, include URLs, accession numbers or DOIs. If this information will only be available after acceptance, indicate this by ticking the box below. For example: *All XXX files are available from the XXX database (accession number(s) XXX, XXX).*
- If the data are all contained **within the manuscript and/or Supporting Information files**, enter the following: *All relevant data are within the manuscript and its Supporting Information files.*
- If neither of these applies but you are able to provide **details of access elsewhere**, with or without limitations, please do so. For example:

*Data cannot be shared publicly because of [XXX]. Data are available from the XXX Institutional Data Access / Ethics Committee (contact via XXX) for researchers who meet the criteria for access to confidential data.*

*The data underlying the results presented in the study are available from (include the name of the third party*

All relevant data are within the manuscript and its Supporting Information files.

*and contact information or URL).*

- This text is appropriate if the data are owned by a third party and authors do not have permission to share the data.

\* typeset

Additional data availability information:

1

2

3

4 **Title page**

5

6

7 **Title**

8 Effect of different long-term fertilizer management on nitrogen fixing bacteria  
9 community in a double-cropping paddy field of southern China

10

11

12 **Author names**

13 Haiming Tang, Chao Li, Lihong Shi, Xiaoping Xiao, Kaikai Cheng, Li Wen, Weiyan

14 Li

15

16

17 **Affiliations**

18 Hunan Soil and Fertilizer Institute, Changsha 410125, China

19

20

21

22 **\* Corresponding author**

23 Haiming Tang

24 Tel: +86 731 84696102; Fax: +86 731 84691581; E-Mail address:

25 [tanghaiming66@163.com](mailto:tanghaiming66@163.com).

26

27

28

29

30

1 **Effect of different long-term fertilizer management on nitrogen fixing bacteria community in**  
2 **a double-cropping paddy field of southern China**

3  
4 **Abstract:** While nitrogen (N) fixation by soil microorganisms is an important N cycling processes,  
5 but there is still limited information on how the soil microbes that drive this processes respond to  
6 soil physical and chemical properties changes under double-cropping rice (*Oryza sativa* L.) paddy  
7 field in southern China. Therefore, the 34-year long-term fertilizer regime on nitrogen fixing  
8 bacteria community under double-cropping rice field in southern China were studied by using  
9 PCR-DGGE method in the present paper. The field experiment were including four different  
10 fertilizer treatments: chemical fertilizer alone (MF), rice straw residue and chemical fertilizer (RF),  
11 30% organic manure and 70% chemical fertilizer (OM), and without fertilizer input as control  
12 (CK). The results showed that the diversity index of *cbbLR* gene and *nifH* gene were increased  
13 with RF and OM treatments, compared with CK treatment. Compared with CK treatment, the  
14 abundance of *cbbLR* gene were increased by 6.70, 12.19 and 23.94×10<sup>7</sup> copies g<sup>-1</sup> with MF, RF  
15 and OM treatments, respectively. Meanwhile, the abundance of *nifH* gene were increased by 5.40,  
16 8.82 and 23.90×10<sup>9</sup> copies g<sup>-1</sup> with MF, RF and OM treatments, compared with CK treatment,  
17 respectively. The results also indicated that soil autotrophic azotobacter and nitrogenase activities  
18 with RF and OM treatments were significantly higher (*p*<0.05) than that of CK treatments. There  
19 is an obvious difference in characteristic of N fixing bacteria community between application of  
20 inorganic fertilizers and organic manure treatments. In summary, the results indicated that  
21 abundances of N fixing bacteria community in the double-cropping rice paddy soil were increased  
22 by application of crop residue and organic manure practice.

23 **Key words:** rice; fertilizer treatment; N fixing bacteria; *nifH* gene; paddy field

24  
25 **Introduction**

26 Biological nitrogen (N) fixation, the conversion of nitrogen gas (N<sub>2</sub>) into ammonia mediated  
27 by bacteria, is considered an important way to maintain a reliable N-supply for rice growth in  
28 paddy soil [1]. The N accumulation per year via biological N<sub>2</sub>-fixation in paddy field was 32 kg  
29 hm<sup>-2</sup> higher than that of in upland soil [2]. This is attributed to the stimulation of N<sub>2</sub>-fixing  
30 bacteria (*cbbLR*) and nitrogenase (*nifH*) activity under anaerobic flooded condition [3-4]. Previous



1 studies found that bacteria with N<sub>2</sub>-fixation capacity were distributed through diverse prokaryotic  
2 taxa including but not limited to *Proteobacteria* ( $\alpha$ -,  $\beta$ -,  $\gamma$ - and  $\delta$ -proteobacteria), phototrophic  
3 Cyanobacteria and Clostridia [1, 5-6]. The succession of N<sub>2</sub>-fixing bacteria throughout the entire  
4 period of paddy field remains largely not clear, understanding the succession of the N<sub>2</sub>-fixing  
5 bacterial community during the paddy field and enhancing biological N<sub>2</sub>-fixation will be  
6 conducive to improve rice production with minimal N-fertilizer application [7].

7 In recent years, the rapid development of 16S rRNA gene sequencing technology and  
8 functional prediction has provided insight into community structure and function of bacteria in soil  
9 [8]. Molecular approaches have been developed and successfully applied to describe diazotroph  
10 communities, such as quantitative polymerase chain reaction (qPCR) and cloning [9], denaturing  
11 gradient gel electrophoresis (DGGE) [10], PCR-restriction fragment length polymorphism (RFLP),  
12 and fluorescently labelled terminal (FLP)-RFLP [11-12]. These approaches provide a more  
13 complete picture of the diazotrophic communities in various environments than do cultured-based  
14 approaches, such as soil, continental margin sediments, and the rhizosphere of native wetland  
15 species [13]. These studies found that nitrogen-fixing bacteria occur predominantly in the upper  
16 soil layer (5 cm depth) and are estimated to make up about 5% of the total bacterial population, as  
17 well as showing that environmental factors affected the activity and community of nitrogen-fixing  
18 bacteria, such as soil biogeochemical properties [12].

19 Rice (*Oryza sativa* L.) is one of the main crops in Asia, and double-cropping rice system  
20 (early rice and late rice) is the main land use in southern China [14]. ~~It is benefit practices~~  
21 maintaining or improving the paddy soil quality and fertility ~~by application of fertilizer~~  
22 ~~management~~ (organic fertilizer, inorganic fertilizer). ~~And the~~ different fertilizer management may  
23 profound effects on soil physical and chemical characteristics such as pH, soil bulk density, SOC  
24 content [15], which in return affect nitrogen fixation and soil microbiological properties.  
25 Therefore, the 34-year long-term field experiment with different fertilizer treatments were  
26 conducted in a double-cropping rice system in the southern China. Hence, the objective of this  
27 study was: (1) to investigate the diversity of nitrogen-fixing bacteria in rice non-rhizosphere soil  
28 under different long-term fertilization conditions; (2) to analysis molecular diversity of the *cbbLR*  
29 and *nifH* gene and its phylogenetic with different fertilizer practices in a double-cropping rice  
30 system by using PCR-DGGE technology.

1

## 2 **Materials and methods**

### 3 **Sites and cropping system**

4 The experiment ~~was beginning in 1986. It~~ was located in NingXiang County (28°07' N,  
5 112°18' E) of Hunan Province, China. The climatic conditions of the experiment field, the ~~surface~~  
6 soil physical and chemical properties (0–20 cm) ~~beginning of~~ this experiment and crop rotation  
7 systems ~~as~~ described by Tang *et al.* (2018) [16].

### 8 **Experimental design**

9 The experiment ~~including~~ four fertilizer treatments: chemical fertilizer alone (MF), rice straw  
10 residue and chemical fertilizer (RF), ~~and~~ 30% organic manure and 70% chemical fertilizer (OM),  
11 ~~without fertilizer input as~~ control (CK). A randomized ~~block design was adopted in the plots,~~ with  
12 three replications of each treatment. ~~And~~ each plot size was 66.7 m<sup>2</sup> (10 × 6.67 m). The  
13 experiment ensured ~~that~~ the same amount of N, phosphorus pentoxide (P<sub>2</sub>O<sub>5</sub>), potassium oxide  
14 (K<sub>2</sub>O) for all fertilizer treatments during early and late rice growing season, ~~respectively. Details~~  
15 information about fertilizer management and ~~field arrangement as~~ described by Tang *et al.* (2018)  
16 [16].

### 17 **Soil sampling and sample preparation**

18 Soil samples were collected at tillering stage of late rice in 2019. The soil samples were taken  
19 ~~from adjacent~~ to the rice plants (i.e. non-rhizosphere soil) ~~were sampled at depth 0-20 cm.~~  
20 Correspondingly, one composite soil consisting of twenty cores was taken from each plot. ~~Thus,~~  
21 three composite samples of soils with each fertilizer treatment were collected at sampling time.  
22 The fresh samples were placed immediately in ice box and transported to the laboratory. The  
23 mixed samples were split into two parts: one part was stored at 4°C for subsequent soil azotobacter  
24 and enzyme activity assays, and the other was stored at -80°C for use in molecular experiments.

### 25 **Soil laboratory analysis**

#### 26 Soil autotrophic azotobacter and nitrogenase activities

27 Soil autotrophic azotobacter was determined described by Li *et al.* (2008) [17]. The number  
28 of soil autotrophic azotobacter was determined by using plate count method, and the medium was  
29 Ashby medium, which was expressed by the number of colony per gram of fresh soil (cfu g<sup>-1</sup>).

30 The soil nitrogenase activity was determined using the acetylene (C<sub>2</sub>H<sub>2</sub>) reduction technique

1 described by Schwinghamer et al. (1980) [18], but with some modifications. The fresh compost  
2 sample (7 g) was incubated in a 100 mL sterile flask with a rubber stopper. The compost sample  
3 was then amended with a solution containing glucose to obtain 1 mg C/g compost. Next, 10% of  
4 the air in the flask was replaced by acetylene gas and the flask was incubated in the dark at 28°C  
5 for 48 h. The ethylene (C<sub>2</sub>H<sub>4</sub>) generated was determined by gas chromatography using a flame  
6 ionization detector (Trace GC Ultra, Thermo-Fisher, USA). The nitrogenase activity was  
7 expressed as 1 nmol C<sub>2</sub>H<sub>4</sub> per hour per gram of dry sample (C<sub>2</sub>H<sub>4</sub> nmol/(g·h)).

8 Genomic DNA extraction and qPCR detection of the *cbbLR* gene and *nifH* gene

9 Before extracting the DNA, all of the compost samples were freeze-dried in a freeze dryer  
10 (Songyuan, Beijing, China) to ensure that the water content was at the same low level. The  
11 freeze-dried samples were then crushed and sieved through 1-mm pore filters using an  
12 ultra-centrifugal mill (ZM200, Retsch, Germany). DNA was extracted from the total microbial  
13 community using 0.5 g of the freeze-dried samples with a FastDNA Spin Kit for soil (MP  
14 Biomedicals, LLC, Illkirch, France), according to the manufacturer's instructions. The  
15 concentration and quality of the DNA were determined using an Epoch Multi-Volume  
16 Spectrophotometer System (BioTek, USA). The extracted DNA was stored at -20°C for  
17 subsequent use.

18 The copy numbers of the *nifH* gene in nitrogen-fixing bacteria were determined by qPCR,  
19 which was conducted in triplicate with an iCycler IQ5 Thermocycler (Bio-Rad, USA) using the  
20 primer sets: PolF (5'-TGCGAYCCSAARGCBGACTC-3') and PolR (5'-ATSGCCATCA  
21 TYTCRCCGGA-3') [19]. Each reaction system comprised a 20 µL volume containing 10 µL of 2  
22 × UltraSYBR Mixture (Cwbiotech, Beijing, China), 0.4 µL (10 µM) of each primer, 2 µL of DNA  
23 template, and the final volume was adjusted with sterile water. The qPCR reactions were  
24 conducted with an initial denaturation step at 95°C for 10 min, followed by 40 cycles at 95°C for  
25 10 s, 60°C for 30 s, and 72°C for 32 s. The data were retrieved at 72°C. The qPCR reaction was  
26 repeated in triplicate.

27 The copy numbers of the *cbbLR* gene in nitrogen-fixing bacteria were determined by qPCR,  
28 which was conducted in triplicate with an iCycler IQ5 Thermocycler (Bio-Rad, USA) using the  
29 primer sets: *cbbLR* (5'-AAG GAY GAC GAG AAC ATC-3') and *cbbLRintR* (5'-TGC AGS ATC  
30 ATG TCR TT-3'). The PCR reaction system of *cbbLR* gene amplification is the same as that of

1 *nifH* gene. The qPCR reactions were conducted with an initial denaturation step at 95°C for 15  
2 min, followed by 40 cycles at 91°C for 1 min, 55°C for 1 min, and 72°C for 2 min. The data were  
3 retrieved at 68°C for 10 min. The correct length of PCR product was detected in 1.5% agarose gel  
4 electrophoretic.

5 The PCR products amplified from soil were used to obtain a standard curve for the *nifH* gene  
6 product. The standard curve for qPCR was produced using tenfold serial dilution of linearized  
7 plasmids containing the cloned *nifH* genes. The range of template copies used to generate the  
8 standard curve was  $1.34 \times 10^5$  to  $1.34 \times 10^9$  copies of template. A melting curve was obtained at  
9 the end of the reaction to verify the specificity of the amplicon. The standard curve indicated a  
10 PCR amplification efficiency of about 88.5% and linearity of 0.99. The PCR products amplified  
11 from soil were used to obtain a standard curve for the *cbbLR* gene product. The standard curve for  
12 qPCR was produced using tenfold serial dilution of linearized plasmids containing the cloned  
13 *cbbLR* genes. The range of template copies used to generate the standard curve was  $3.10 \times 10^5$  to  
14  $3.10 \times 10^9$  copies of template. A melting curve was obtained at the end of the reaction to verify the  
15 specificity of the amplicon. The standard curve indicated a PCR amplification efficiency of about  
16 98.5% and linearity of 0.99.

#### 17 PCR and DGGE analysis

18 The primer sets used for PCR amplification were the same as those employed for qPCR. A  
19 GC clamp was attached to the forward primer (CGCCCGG GGC GCGCC  
20 CCGGGCGGGCGGG GGCACGGGGGG) to prevent complete separation of the DNA strands  
21 during DGGE [20]. Each PCR reaction was performed in a 20 µL reaction mixture containing 1  
22 µL of DNA template, 10 µL of 2 × Power Taq PCR MasterMix (Cwbiotech, Beijing, China), 0.4  
23 µL (10 µM) of each primer, and the final volume was adjusted to 20 µL with sterile water. PCR  
24 amplification was performed with a MyCycler thermal cycle (Bio-Rad, Hercules, CA, USA) using  
25 the following cycling conditions: initial denaturation at 94°C for 5 min, 40 cycles of denaturation  
26 at 94°C for 1 min, annealing at 58°C for 1.5 min, and extension at 72°C for 1.5 min, followed by a  
27 final extension at 72°C for 10 min and cooling to 4°C. The PCR product size was determined by  
28 electrophoresis on 1% agarose gel.

29 DGGE was performed using a Dcode™ Universal Detection System instrument according to  
30 the manufacturer's instructions (Bio-Rad, USA). The 20 µL PCR products were loaded onto 8%

1 polyacrylamide gel with a denaturing gradient of 30–60%. Electrophoresis was conducted in 1×  
2 TAE buffer at 60°C for 12 h at a constant voltage of 80 V (Dcode™ Universal Detection System,  
3 Bio-Rad, USA). After electrophoresis, the gels were stained with 1: 10000 DuRed (Sigma, USA)  
4 for 30 min in the dark and then photographed under UV light using the Gel Doc XR System  
5 (Bio-Rad, Hercules, CA, USA). The results of the PCR-DGGE profiles of soil microbial *cbbLR*  
6 gene and *nifH* gene were shown in Fig. S1 and Fig. S2.

#### 7 Cloning and sequencing

8 After DGGE, the prominent bands were excised from the gel. The bands were triturated in  
9 TE buffer (30 µL) and stored overnight at 4°C. The supernatant was employed as the template for  
10 PCR to sequence DNA bands using primer sets without the GC-clamp. Suitable PCR products  
11 were submitted to OE Biotech Company (Shanghai, China) for sequencing. The sequences were  
12 then assembled and compared using BLAST via the National Center for Biotechnology  
13 Information (NCBI) (<http://www.ncbi.nlm.nih.gov>). Sequence analysis and operational taxonomic  
14 units (OTUs) identification were according to the methods of Fagen et al. (2012) [21]. A  
15 neighbor-joining tree established using MEGA4 software with the Kimura two-parameter method  
16 was generated to create phylogenetic reconstructions. A bootstrap consensus tree inferred from  
17 1000 replicates was obtained to represent the evolutionary history of the taxa analyzed.

#### 18 **Statistical analysis**

19 DGGE images were analyzed by using Quantity One (version 4.6.2, Bio-Rad, USA). The  
20 similarities of the community fingerprints were calculated by using the unweighted pair group  
21 method with arithmetic mean to analyze the hierarchical clusters. The diversity of nitrogen-fixing  
22 bacteria was determined with the Diversity index, Richness index, and Evenness index [22].

23 The statistical analyses of this manuscript were conducted by using SAS 9.3 software  
24 package [23]. The ~~data of~~ different fertilizer treatments means ~~in this manuscript~~ were compared  
25 by using one-way analysis of variance (ANOVA) following standard procedures at the  $p < 0.05$   
26 probability level. The results were expressed as means and standard errors.

27

## 28 **Results**

### 29 **Soil autotrophic azotobacter and nitrogenase activities**

30 The number of soil autotrophic azotobacter ranged from 6.25 to  $17.34 \times 10^5$  cfu/g, in the

1 different fertilizer treatments, the number of soil autotrophic azotobacter in the MF, RF and OM  
 2 treatments were 1.88, 2.77 and 2.27 times that of CK treatment, respectively. The results showed  
 3 that number of soil autotrophic azotobacter with RF treatment were significantly higher ( $p<0.05$ )  
 4 than that of MF, OM, CK treatments. And the number of soil autotrophic azotobacter with OM,  
 5 MF treatments were significantly higher ( $p<0.05$ ) than that of CK treatment (Fig. 1, a).

6 The soil nitrogenase activities ranged from 2.54 to 8.13 C<sub>2</sub>H<sub>4</sub> nmol/(g·h), in the different  
 7 fertilizer treatments, the soil nitrogenase activities in the MF, RF and OM treatments were 1.74,  
 8 3.09 and 3.20 times that of CK treatment, respectively. The results showed that soil nitrogenase  
 9 activities with RF, OM treatments were significantly higher ( $p<0.05$ ) than that of MF, CK  
 10 treatments. And the soil nitrogenase activities with MF treatment were significantly higher  
 11 ( $p<0.05$ ) than that of CK treatment (Fig. 1, b).

12 **Diversities of *cbbLR* and *nifH* gene**

13 The diversities of *cbbLR* gene and *nifH* gene as affected by different long-term fertilizer  
 14 treatments were showed in Table 1. The diversity index of *cbbLR* gene with MF treatment were  
 15 significantly higher ( $p<0.05$ ) than that of CK treatment. Compared with CK treatment, the  
 16 diversity index of *cbbLR* gene with MF treatment were increased 11.38%. And the richness of  
 17 *cbbLR* gene with MF, RF and OM treatments were significantly higher ( $p<0.05$ ) than that of CK  
 18 treatment. Meanwhile, there is not significantly difference ( $p>0.05$ ) in evenness of *cbbLR* gene  
 19 among MF, RF, OM and CK treatments.

20 The diversity index of *nifH* gene with MF treatment were significantly higher ( $p<0.05$ ) than  
 21 that of CK treatment. Compared with CK treatment, the diversity index of *nifH* gene with MF  
 22 treatment were increased 11.22%. And the richness of *nifH* gene with MF, RF and OM treatments  
 23 were significantly higher ( $p<0.05$ ) than that of CK treatment. Meanwhile, there is not significantly  
 24 difference ( $p>0.05$ ) in evenness of *nifH* gene among MF, RF, OM and CK treatments. That is, the  
 25 diversity index of *cbbLR* gene and *nifH* gene were increased under application fertilizer condition.

26  
 27 Table 1 Diversities of *cbbLR* and *nifH* gene as affected by different long-term fertilizer treatments

| Treatments | <i>cbbLR</i>    |                |                | <i>nifH</i>     |                |                |
|------------|-----------------|----------------|----------------|-----------------|----------------|----------------|
|            | Diversity index | Richness index | Evenness index | Diversity index | Richness index | Evenness index |
| CK         | 3.25±0.10b      | 2.58±0.09b     | 2.26±0.07a     | 3.12±0.09b      | 2.51±0.06b     | 2.25±0.07a     |
| MF         | 3.62±0.09a      | 3.22±0.07a     | 2.22±0.06a     | 3.47±0.10a      | 2.76±0.08a     | 2.24±0.06a     |

|    |             |            |            |             |            |            |
|----|-------------|------------|------------|-------------|------------|------------|
| RF | 3.47±0.10ab | 3.17±0.09a | 2.29±0.07a | 3.43±0.10ab | 2.70±0.08a | 2.28±0.07a |
| OM | 3.55±0.10ab | 3.11±0.09a | 2.31±0.07a | 3.35±0.10ab | 2.65±0.07a | 2.32±0.07a |

1 MF: chemical fertilizer alone; RF: rice straw residue and chemical fertilizer; OM: 30% organic

2 manure and 70% chemical fertilizer; CK: without fertilizer input as control.

3 Values are presented as mean ± standard error.

4  Different letters in the same column indicate significant difference at  $p<0.05$ .

5 ~~The same as below.~~

6

### 7 Abundance of *cbbLR* and *nifH* gene

8 There were ~~obvious~~ effects of different long-term fertilizer treatments on abundance of  
 9 *cbbLR* gene and *nifH* gene (Table 2). The abundance of *cbbLR* gene and *nifH* gene with OM  
 10 treatment ~~were~~ significantly higher ( $p<0.05$ ) than that of MF, RF CK treatments. And the  
 11 abundance of *cbbLR* gene and *nifH* gene with MF, RF treatments ~~were~~ significantly higher  
 12 ( $p<0.05$ ) than that of CK treatment, and the order of abundance of *cbbLR* gene and *nifH* gene with  
 13 different fertilizer treatments was showed OM>RF>MF>CK.

14 The abundance of *cbbLR* gene ranged from 1.42 to  $25.36 \times 10^7$  copies/g, in the different  
 15 fertilizer treatments, the abundance of *cbbLR* gene in the MF, RF and OM treatments ~~were~~ 5.72,  
 16 9.58 and 17.86 times  that of CK treatment, respectively. The abundance of *nifH* gene ranged from  
 17 2.45 to  $26.35 \times 10^9$  copies/g, in the different fertilizer treatments, the abundance of *nifH* gene in the  
 18 MF, RF and OM treatments ~~were~~ 3.20, 4.60 and 10.76 times  that of CK treatment, respectively.

19

20 Table 2 Abundance of *cbbLR* and *nifH* gene as affected by different long-term fertilizer treatments

| Gene                                   | Treatments |             |             |            |
|----------------------------------------|------------|-------------|-------------|------------|
|                                        | MF         | RF          | OM          | CK         |
| <i>cbbLR</i> ( $\times 10^7$ copies/g) | 8.12±0.43c | 13.61±0.39b | 25.36±0.23a | 1.42±0.04d |
| <i>nifH</i> ( $\times 10^9$ copies/g)  | 7.85±0.49c | 11.27±0.33b | 26.35±0.22a | 2.45±0.05d |

21 ~~Different letters in the same line indicate significant difference at  $p<0.05$ .~~ 

22

### 23 Cluster analysis of *cbbLR* and *nifH* gene

24 The community structures of *cbbLR* gene and *nifH* gene in soils were characterized by cluster  
 25 analysis (Fig. 2 a, b). The results indicated that inorganic fertilizer and organic manure had a  
 26 variety of effects on the soil *cbbLR* gene, which revealed that RF, CK treatments were different  
 27 from MF and OM treatments (Fig. 2 a). A similar variation in the *nifH* gene structure was detected

1 among different fertilizer regime (Fig. 2 b). These findings indicated that the fertilizer regime  
2 might be a major factor affecting the soil *cbbLR* gene and *nifH* gene structure. The results revealed  
3 three major clusters with different fertilizer regime, MF and OM treatment can well aggregate into  
4 one cluster, which showed that *cbbLR* gene or *nifH* gene have relatively high similarity in  
5 community structure under the two fertilizer treatments.

#### 6 **Community structure of *cbbLR* and *nifH* gene**

7 To identify the ~~different of fertilizer regime on~~ *cbbLR* gene and *nifH* gene community  
8 composition, we conducted the neighbor-joining phylogenetic analysis (Fig. 3, Fig. 4) based on  
9 the taxonomic affiliations of the sequences obtained in this study, using all detected OTUs. The  
10 results indicated that the main dominant flora of *cbbLR* gene belongs to the *Betaproteobacteria*,  
11 *Pseudoacidovorax*, *Azospira* and *Ideonella*. Interestingly, the results showed that ~~the most genus~~  
12 were affiliated with the cluster 1 lineage, and some ~~genus~~ were affiliated with the cluster 2 lineage,  
13 cluster 3 lineage and cluster 4 lineage in the soil samples (Fig. 3). In the first cluster, Band 9, Band  
14 10, Band 11, Band 13 were similar to nitrogen fixing bacteria HM565436.3, Band 5 was similar to  
15 bacteria HQ335728.2, Band 14 was similar to *Ideolla decloratans* strain EU542647.1. In the  
16 second cluster, Band 4, Band 6 and Band 7 were clustered with *Pseudoacidovorax*. And Band 1,  
17 Band 5, Band 8 and *Azospira* were clustered in the third cluster, and Band 12, Band 15 were  
18 different from other sequences.

19 According to the sequence of *nifH* gene and the most similar sequence in GenBank, the  
20 phylogenetic analysis showed that ~~the most genus~~ belonged to the cluster 1, Band 2, 3 and Band 6  
21 belong to cluster 2, while Band 1 and Band 4-5 belong to cluster 3. In the database of GenBank,  
22 the gene sequences of cultivated microorganisms similar to Band 3 and Band 4 can be retrieved,  
23 the gene sequences of *myzf* of the similar cultivated microorganisms can not be retrieved from the  
24 other sequences, and only some of the sequences of uncultured microorganisms are similar to  
25 them.

26

## 27 **Discussion**

### 28 **Effects of fertilizer regime on soil autotrophic azotobacter and nitrogenase activities**

29 ~~In the present study, this result~~ indicated that number of soil autotrophic azotobacter were  
30 significantly enhanced under long-term application of organic manure and crop residue condition,



1 ~~which were agree~~ with Yuan et al. (2011) [24], ~~the reason maybe that~~ the number of soil  
2 autotrophic azotobacter ~~were~~ stimulated under application of ~~fertilizer condition~~, which provide  
3 energy substrates for soil autotrophic azotobacter growth. In the different fertilizer treatments,  
4 number of soil autotrophic azotobacter with OM and RF treatments ~~were~~ higher than that of the  
5 other fertilizer treatments, ~~this phenomenon were suggestion~~ that SOC content was important  
6 factor for autotrophic azotobacter growth [15]. On the other hand, the total input of organic carbon  
7 of crop residue carbon and organic fertilizer source carbon ~~were~~ significantly increased, and the  
8 components of organic carbon also changed [25]. In the present study, the results indicated that  
9 number of soil autotrophic azotobacter with MF treatment ~~were~~ lower than that of OM and RF  
10 treatments, which suggested that autotrophic azotobacter~~s~~ in paddy field were restricted under  
11 long-term application of chemical fertilizer condition.

12 The soil nitrogenase activity is an important indicator for estimating the capacity for  
13 biological nitrogen fixation [8]. ~~In the present study, this result~~ indicated that soil nitrogenase  
14 activities were significantly enhanced under long-term application of organic manure and crop  
15 residue condition, higher residual organic matter in OM, RF and MF soil than ~~without fertilizer~~  
16 ~~input~~ soil might result in higher ~~the~~ nitrogenase activity in OM, RF and MF soil than CK soil [26].  
17 The reason ~~maybe~~ that nitrogen fixing activity of soil nitrogen fixing microorganism ~~were~~  
18 stimulated under ~~application of fertilizer condition~~, which provide energy substrates for soil  
19 nitrogenase growth. Meanwhile, ~~in~~ the different fertilizer treatments, this study indicated that soil  
20 nitrogenase activity with OM treatment ~~were~~ higher than that of the other treatments, ~~this~~  
21 ~~phenomenon were suggestion~~ that SOC content was an important factor promote the growth of  
22 nitrogenase. The nitrogenase activity with RF treatment ~~were~~ lower than that of OM treatment, ~~the~~  
23 ~~reason maybe that~~ RF treatment ~~may stimulate~~ the nitrogen fixation activity of soil microorganism,  
24 but the inhibition of N content on nitrogenase activity ~~is~~ higher than that of crop residue effects, so  
25 the activity of nitrogenase ~~were~~ decreased. These again confirmed the succession of N<sub>2</sub>-fixing  
26 bacteria along with the ongoing consumption of organic manure in paddy soil. However, the soil  
27 nitrogenase activity ~~were~~ inhibited under application of chemical ~~fertilizer condition~~ compared  
28 with application of organic manure and crop residue management, which ~~were suggestion~~ that  
29 nitrogenase activities ~~were decrease~~ with low SOC content ~~by long-term application of chemical~~  
30 ~~fertilizer practice~~. Soil nitrogenase activity ~~were~~ increased with application of organic manure and

1 crop residue practices in agree with the previous studies [6, 27].

## 2 **Effects of fertilizer regime on community structure of *cbbLR* and *nifH* gene**

3 In the previous studies, the results indicated that the differences of soil physical and chemical  
4 properties can affect the community structure of nitrogen fixing microorganisms [28]. In this study,  
5 we found that the nitrogen-fixing bacteria community were more similar for different fertilizer  
6 treatments that were closer together. Different soil ecological environmental parameters affect the  
7 activity of soil autotrophic azotobacter and nitrogenase in particular. One of the key differences  
8 among the soil samples was the fertilizer treatments. The results indicated that fertilizer  
9 management may have been the strongest influence on the portion of the nitrogen-fixing bacteria  
10 community. Long-term application of crop residue and organic manure management (RF and OM  
11 treatments) had a greater diversity in the *cbbLR* and *nifH* genes, while application of chemical  
12 fertilizer practice (MF treatment) had a lower diversity in the *cbbLR* and *nifH* genes. Limmer and  
13 Drake (1996) [29] found that the levels of C and N influenced the activity and distribution of  
14 nitrogen fixation bacteria. In our previous study, MF and OM treatments had the highest  
15 concentrations of C and N [15], as well as the highest number of clones and diversity of *cbbLR*  
16 and *nifH* genes. In contrast, MF and CK treatments had the lowest C and N levels, and had  
17 smallest number of clones and diversity of *cbbLR* and *nifH* genes, respectively. Thus, the C and N  
18 content in paddy field may be the key factors influencing the nitrogen-fixing bacterial community.

19 There have been a large number of papers on the molecular diversity and phylogenetic  
20 analysis of *cbbLR* and *nifH* in different plant communities or geochemical environments using  
21 PCR-based analysis methods, giving rise to a large number of unidentified *cbbLR* and *nifH* clone  
22 sequences. In this study, the results showed that uncultured nitrogen fixing bacteria were found in  
23 the soil sample, and the other corresponding microorganisms with the highest homology belonged  
24 to *Proteobacteria*, *Betaproteobacteria*, *Pseudacidovorax*, *Azospira* and *Ideonella*, respectively.  
25 The results showed that the genetic diversity of azotobacter were rich in the paddy soil. Jia et al.  
26 (2020) [8] result also proved that it is suitable for biological nitrogen fixation in rhizosphere soil  
27 of paddy field. In this study, some unknown *cbbLR* and *nifH* clone sequences were also found.  
28 The phylogenetic tree revealed some important patterns from the new nitrogen-fixing bacteria. (i)  
29 The *cbbLR* and *nifH* tree did not indicated that there was a clear relation to the different fertilizer  
30 treatments sampling soils; however, there were clearly different dominant nitrogen fixing bacteria

1 populations at fertilizer treatments, which suggested that soil environmental parameters might be  
2 influencing the diversity and distribution of these microbial populations. (ii) The majority of the  
3 sequenced clones were not closely related to any known cultivated nitrogen-fixing bacteria.  
4 Fifty-five percent of the sequenced clones exhibited less than 72% nucleotide acid identity with  
5 known nitrogen fixation bacteria in the database, suggesting that they are unique and may  
6 represent novel sequences of nitrogen fixing community, and that most members of *cbbLR* and  
7 *nifH*-containing bacteria in the community might be unculturable. Provided that the clone libraries  
8 represent the in situ microbial community structure at the functional cluster level, the novel  
9 clusters of bacteria appear to be abundant in the study area. Real-time PCR and other molecular  
10 methods will be needed to estimate or quantify these novel clusters in order to verify their  
11 abundance in the soil. In order to understand their functionality, further cultivation strategies will  
12 also be needed to recover organisms with novel sequences.

13 This study first discussed the communities and structure of nitrogen fixing bacteria with  
14 different fertilizer regime under double-cropping rice field in southern China. ~~As well as~~  
15 contributing information on their genetic diversity and providing some clone sequences of  
16 nitrogen fixation bacteria in double-cropping rice areas, ~~we also present~~ a view of the fertilizer  
17 management factors that affect this important group of bacteria. The effects of different soil  
18 environmental factors on bacteria communities associated with long-term changes need to be  
19 investigated in order to better understand the linkage between the functional processes and  
20 microbial community structures involved in nitrogen cycling.

21

## 22 Conclusion

23 In the present study, the results showed that number of cultivable nitrogen fixing  
24 microorganisms was significantly increased by long-term application of fertilizer treatments. The  
25 highest number of nitrogen fixing microorganisms with RF and OM treatments, followed by MF  
26 treatment. Meanwhile, this study indicated that diversity index and richness of *cbbLR* gene and  
27 *nifH* gene were increased under application of crop residue and organic manure condition. Soil  
28 nitrogenase activities were significantly enhanced under long-term application of organic manure  
29 and crop residue condition, but application of chemical fertilizer practice reduces soil nitrogenase  
30 activities. There is an obvious difference in characteristic of nitrogen fixing bacteria community

1 between application of inorganic fertilizer and organic manure treatments. Therefore, ~~it is a benefit~~  
2 ~~practice to improve~~ soil nitrogen level in a double-cropping paddy field by application of organic  
3 manure and crop residue ~~practice~~. However, future studies ~~were~~ needed to investigate how  
4 changes of nitrogen fixing bacteria community under different ~~fertilizer practice~~ influence ~~on~~  
5 ecological functions of rhizosphere microorganism.

6

## 7 **Acknowledgements**

8 This study was supported by National Natural Science Foundation of China (31872851),  
9 Innovative Research Groups of the Natural Science Foundation of Hunan Province  
10 (2019JJ10003).

11

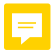

## 12 **References**

- 13 1. Wang S, Pablo GP, Ye J, Huang DF. (2012) Abundance and diversity of nitrogen-fixing  
14 bacteria in rhizosphere and bulk paddy soil under different duration of organic management.  
15 *World J. Microbiol. Biotechnol.* 28: 493–503.
- 16 2. Greenland DJ. (1998) The Sustainability of Rice Farming. CAB International Publication in  
17 Association with the International Rice Research Institute, London, 110–113.
- 18 3. Lalucat J, Bennasar A, Bosch R, García-Valdés E, Palleroni NJ. (2006) Biology of  
19 *Pseudomonas stutzeri*. *Microbiol. Mol. Biol. Rev.* 70: 510–547.
- 20 4. Dos Santos PC, Dean DR. (2011) Co-ordination and fine-tuning of nitrogen fixation in  
21 *Azotobacter vinelandii*. *Mol. Microbiol.* 79: 1132–1135.
- 22 5. Teng QH, Sun B, Fu XR, Li SP, Cui ZL, Cao H. (2009) Analysis of nifH gene diversity in red  
23 soil amended with manure in Jiangxi, South China. *J. Microbiol.* 47: 135–141.
- 24 6. Tang Y, Zhang M, Chen A, Zhang W, Wei W, Sheng R. (2017) Impact of fertilization regimes  
25 on diazotroph community compositions and N<sub>2</sub>-fixation activity in paddy soil. *Agric. Ecosyst.*  
26 *Environ.* 247: 1–8.
- 27 7. Kumar U. (2017) Diazotrophic microbes in rice: a boon to save nitrogen fertilizers. *Microbiol* 6:  
28 1–3.
- 29 8. Jia R, Wang K, Li L, Qu Z, Shen WS, Qu D. (2020) Abundance and community succession of  
30 nitrogen-fixing bacteria in ferrihydrite enriched cultures of paddy soils is closely related to

- 1 Fe(III)-reduction. *Sci. Total Environ.*, 720: 137633.
- 2 9. Zehr JP, Mellon MT, Zani S. (1998) New nitrogen-fixing microorganisms detected in  
3 oligotrophic oceans by amplification of nitrogenase (nifH) genes. *Appl Environ Microbiol* 64:  
4 3444–3450.
- 5 10. Piceno YM, Lovell CR. (2000) Stability in natural bacterial communities. I. Nutrient addition  
6 effects on rhizosphere diazotroph assemblage composition. *Microb Ecol* 39: 32–40.,
- 7 11. Widmer F, Shaffer BT, Porteous LA, Seidler RJ. (1999) Analysis of nifH gene pool  
8 complexity in soil and litter at a Douglas fir forest site in the Oregon Cascade mountain range.  
9 *Appl Environ Microbiol* 65: 374–380.
- 10 12. Shaffer BT, Wildmer F, Porteous LA, Seidler RJ. (2000) Temporal and spatial distribution of  
11 the nifH gene of N<sub>2</sub>-fixing bacteria in forests and clearcuts in western Oregon. *Microb Ecol* 39:  
12 12–21.
- 13 13. Rosch C, Mergel A, Bothe H. (2002) Biodiversity of denitrifying and dinitrogen-fixing  
14 bacteria in an acid forest soil. *Appl Environ Microbiol* 68: 3818–329.
- 15 14. Yang XY, Ren WD, Sun BH, Zhang SL. (2012) Effects of contrasting soil management  
16 regimes on total and labile soil organic carbon fractions in a loess soil in China. *Geoderma*  
17 177–178: 49–56
- 18 15. Tang HM, Li C, Xiao XP, Pan XC, Cheng KK, Shi LH, et al. (2020) Effects of long-term  
19 fertiliser regime on soil organic carbon and its labile fractions under double cropping rice  
20 system of southern China. *Acta Agr. Scand B-S P.*, 70: 409-418.
- 21 16. Tang HM, Xiao XP, Tang WG, Li C, Wang K, Li WY, et al. (2018) Long-term effects of NPK  
22 fertilizers and organic manures on soil organic carbon and carbon management index under a  
23 double-cropping rice system in Southern China. *Commun. Soil Sci. Plan*, 49: 1976–1989.
- 24 17. Li ZG, Luo YM, Teng Y. (2008) Method of soil and environmental microorganisms. Beijing:  
25 Science Press, 97-99.
- 26 18. Schwinghamer EA, Dudman WF, Cannon FC. (1980) In: Bergersen, F.J. (Ed.), Methods for  
27 Evaluating Biological Nitrogen Fixation. John Wiley and Sons, UK, Chichester, 111–138.
- 28 19. Poly F, Monrozier LJ, Bally R. (2001) Improvement in the RFLP procedure for studying the  
29 diversity of nifH genes in communities of nitrogen fixers in soil. *Res. Microbiol.* 152: 95–103.
- 30 20. Muyzer G, De-Waal EC, Uitterlinden AG. (1993) Profiling of complex microbial populations

- 1 by denaturing gradient gel electrophoresis analysis of polymerase chain reaction-amplified  
2 genes coding for 16S rRNA. *Appl. Environ. Microbiol.* 59: 695–700.
- 3 21. Fagen JR, Giongo A, Brown CT, Davis-Richardson A, Gano KA, Triplett EW. (2012)  
4 Characterization of the relative abundance of the citrus pathogen *Ca. Liberibacter asiaticus* in  
5 the microbiome of its insect vector, *Diaphorina citri*, using high throughput 16S rRNA  
6 sequencing. *Open Microbiol J.* 6: 29–33.
- 7 22. Luo ZX, Chen Z, Qiu ZZ, Li YC, Laing GD, Liu A, (2015) Gold and silver nanoparticle  
8 effects on ammonia-oxidizing bacteria cultures under ammoxidation. *Chemosphere* 120:  
9 737–742.
- 10 23. SAS. (2008) SAS Software of the SAS System for Windows. SAS Institute Inc, Cary, NC,  
11 USA.
- 12 24. Yuan HZ, Ge TD, Wu XH, Liu SL, Tong CL, Qin HL, et al. (2012) Long-term field fertilization  
13 alters the diversity of autotrophic bacteria based on the ribulose 1,5-bisphosphate  
14 carboxylase/oxygenase (RubisCO) large subunit genes in paddy soil. *Appl Microbiol Biot*, 95:  
15 1061-1071.
- 16 25. Zhou P, Pan GX, Spaccini R. (2010) Molecular changes in particulate organic matter in a  
17 typical Chinese paddy soil under different long-term fertilizer treatments. *Eur J Soil Sci.*, 61:  
18 231-242.
- 19 26. Das S, Bhattacharyya P, Adhya TK. (2011) Impact of elevated CO<sub>2</sub>, flooding, and temperature  
20 interaction on heterotrophic nitrogen fixation in tropical rice soils. *Biol. Fertil. Soils* 47:  
21 25–30.
- 22 27. Tanaka H, Kyaw KM, Toyota K, Motobayashi T. (2006) Influence of application of rice straw,  
23 farmyard manure, and municipal biowastes on nitrogen fixation, soil microbial biomass N,  
24 and mineral N in a model paddy microcosm. *Biol. Fertil. Soils*, 4: 501–505.
- 25 28. Baumann K, Marschner P, Smernik RJ, Baldock JA. (2009) Residue chemistry and microbial  
26 community structure during decomposition of eucalypt, wheat and vetch residues. *Soil Biol*  
27 *Biochem*, 41: 1966-1975.
- 28 29. Limmer C, Drake HL. (1996) Non-symbiotic N<sub>2</sub>-fixation in acidic and pH-neutral forest soil:  
29 aerobic and anaerobic differentials. *Soil Biol Biochem*, 28: 177–183.
- 30

1  
2  
3  
4  
5  
6  
7  
8  
9  
10  
11  
12  
13  
14  
15  
16  
17  
18  
19  
20  
21  
22  
23

**Figure legend**

Figure 1 Effects of different long-term fertilizer treatments on soil autotrophic azotobacter (a) and soil nitrogenase activities (b)

MF: chemical fertilizer alone; RF: rice straw residue and chemical fertilizer; OM: 30% organic manure and 70% chemical fertilizer; CK: without fertilizer input as control.

Error bars represent standard error of mean. Different letters are significantly different at  $p < 0.05$  level.

The same as below.

Figure 2 Similarity dendrograms (UPGMA, Dice coefficient of similarity) analysis of *cbbLR* gene (a) and *nifH* gene (b) under different fertilizer treatments

Figure 3 Phylogenetic tree of *cbbLR* gene of samples using all OTUs identified under different fertilizer treatments

Figure 4 Phylogenetic tree of *nifH* gene of samples using all OTUs identified under different fertilizer treatments

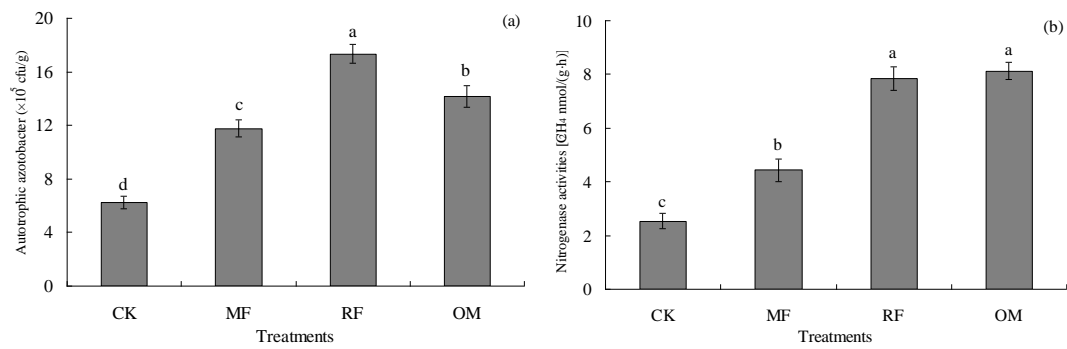

**Figure 1** Effects of different long-term fertilizer treatments on soil autotrophic azotobacter (a) and soil nitrogenase activities (b)

MF: chemical fertilizer alone; RF: rice straw residue and chemical fertilizer; OM: 30% organic manure and 70% chemical fertilizer; CK: without fertilizer input as control.

Error bars represent standard error of mean. Different letters are significantly different at  $p < 0.05$  level.

The same as below.

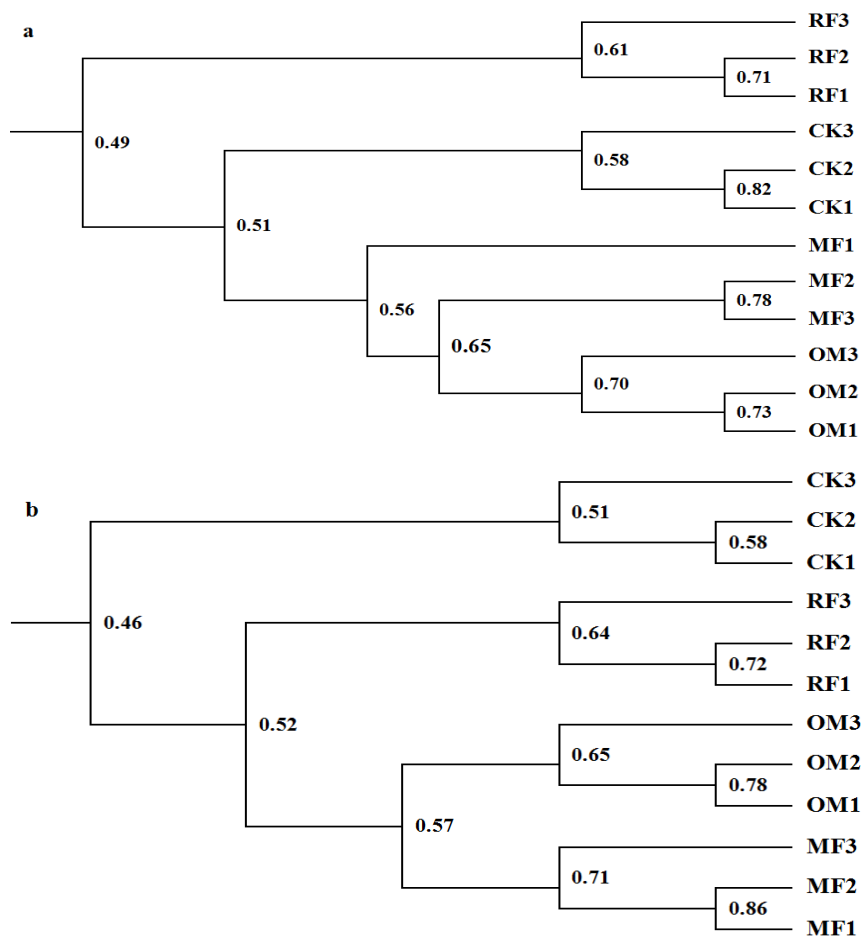

**Figure 2** Similarity dendrograms (UPGMA, Dice coefficient of similarity) analysis of *cbbLR* gene (a) and *nifH* gene (b) under different fertilizer treatments



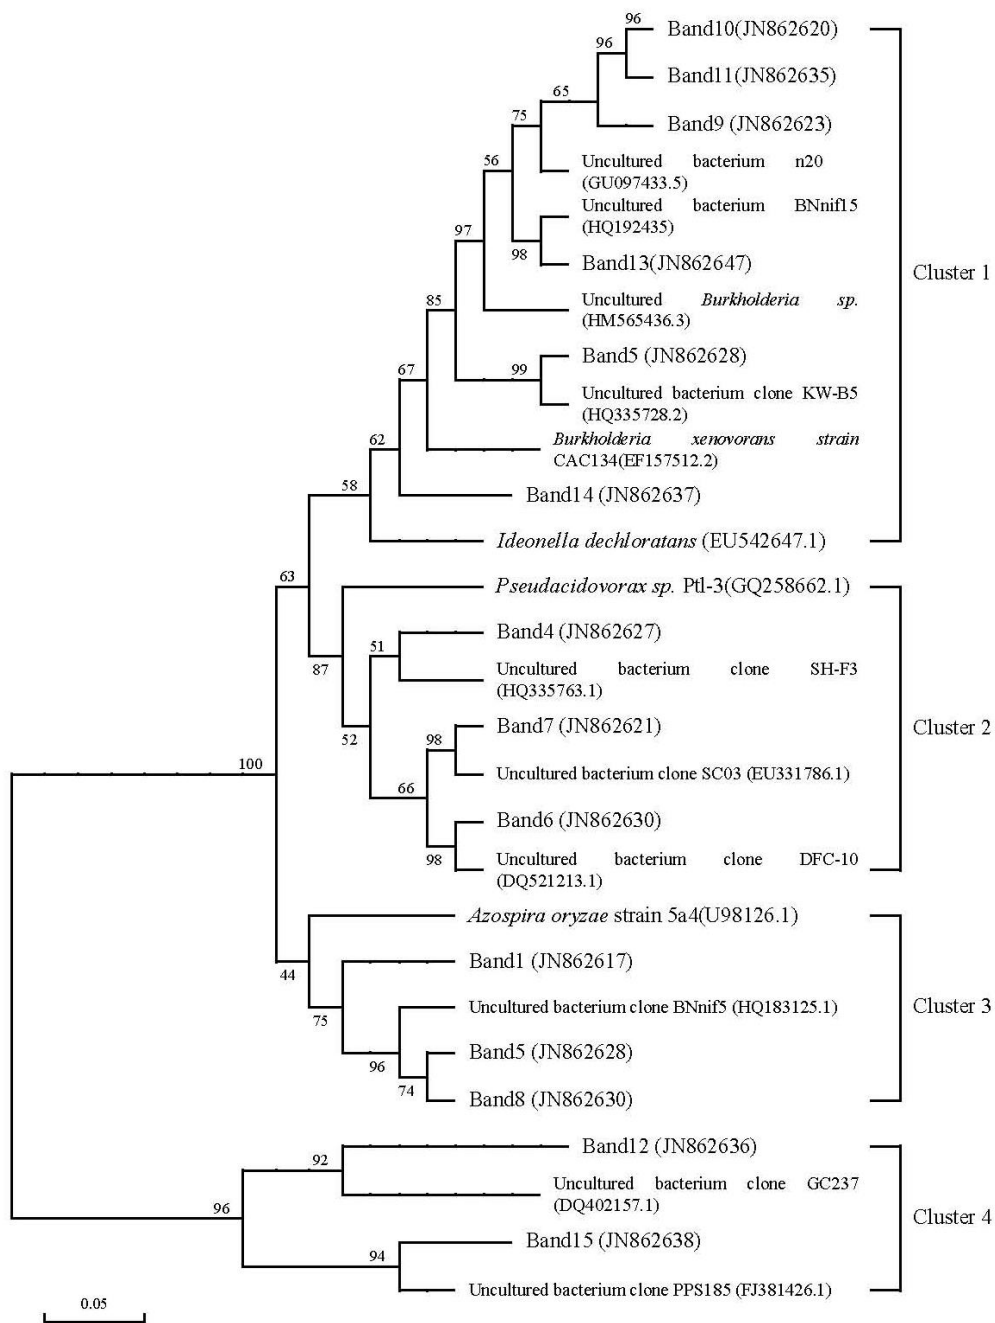

**Figure 3** Phylogenetic tree of *cbbLR* gene of samples using all OTUs identified under different fertilizer treatments

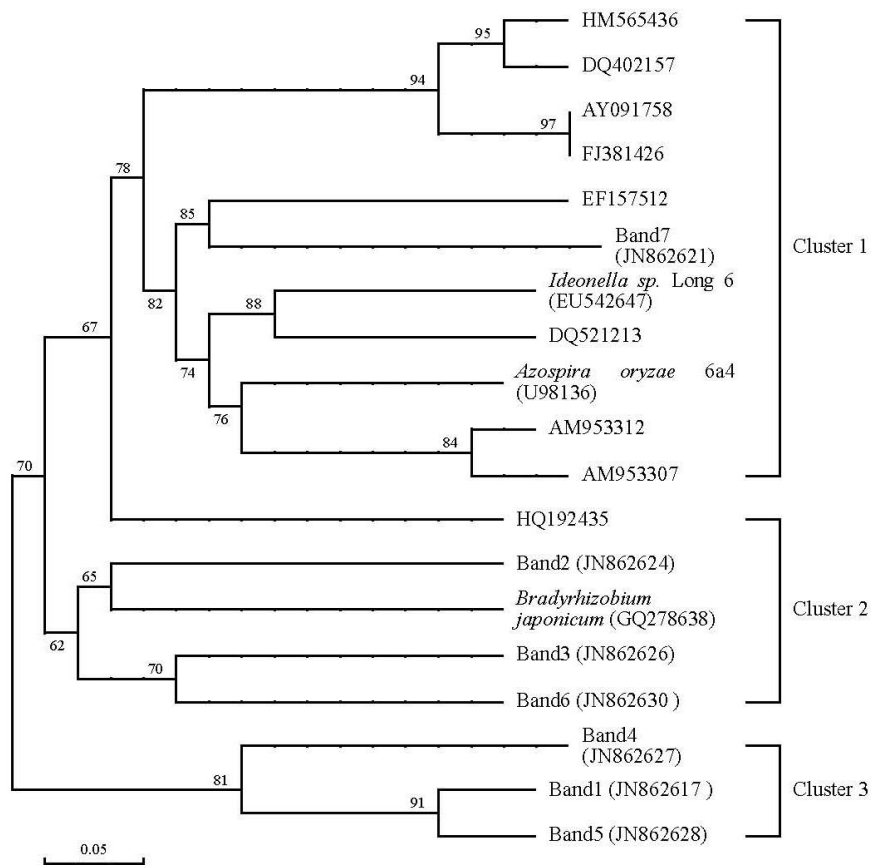

Figure 4 Phylogenetic tree of *nifH* gene of samples using all OTUs identified under different fertilizer treatments
